# Supplementary material for: Experimental verification of simultaneous desalting and molecular preconcentration by ion concentration polarization
Source: Royal Society of Chemistry journal article supplement (doi:10.1039/c7lc00857k), 2017-01-01
Supplement: c7lc00857k1.pdf [file c7lc00857k1.pdf]

Supporting information for

# Experimental Verification of Simultaneous Desalting and Molecular Preconcentration by Ion Concentration Polarization

Wonseok Kim<sup>1</sup>, Sungmin Park<sup>1</sup>, Kihong Kim<sup>1</sup> and Sung Jae Kim<sup>1,2,3†</sup>

<sup>1</sup>*Department of Electrical and Computer Engineering,*

*Seoul National University, Seoul 08826, Republic of Korea*

<sup>2</sup>*Big Data Institute, Seoul National University, Seoul 08826, Republic of Korea*

<sup>3</sup>*Inter-university Semiconductor Research Center,*

*Seoul National University, Seoul 08826, Republic of Korea*

## Supporting Information 1: Concentration calculation in 9-branched device (Figure 3(c))

### ◆ Verification of equation (7) and (8)

Equation (7) and (8) was experimentally verified prior to the main experiment. We conducted an experiment with a device of larger dimension than regular device of this work. With this larger device, direct mass spectrometry measurement was possible by 20 hrs sample collection, c.f. it took 6 months for collecting measurable sample volume with the original device. The comparison results between can calculated by our formula and 20 hrs collection were shown in below table. While the numbers were slightly different (especially the case of outside IDZ) due to unstable formation of ICP layer in the larger device, overall data were concluded to be comparable.

|             | Normalized $c_{Na}$ by<br>eqn (7) & (8) | Normalized $c_{Na}$<br>by 20 hrs collection |
|-------------|-----------------------------------------|---------------------------------------------|
| outside IDZ | 0.577                                   | 0.379                                       |
| inside IDZ  | 0.129                                   | 0.105                                       |
| IEZ         | 1.307                                   | 1.335                                       |

SI Table 1. Comparison between normalized can calculated by our formula and direct measurement from 20 hrs sample collection.

◆ **Quantitative data for Figure 3(c)**

step 1) Measuring initial and final concentration of each outlet reservoir by using ICP-MS or ICP-OES

| <b>Measured concentration of Li<sup>+</sup><br/>(analyte electrolyte)</b> |                           |                         |
|---------------------------------------------------------------------------|---------------------------|-------------------------|
| <i>i</i> <sup>th</sup> branch                                             | $c_{Li_i}^{initial}$ (mM) | $c_{Li_i}^{final}$ (mM) |
| 1                                                                         | 0.216                     | 1.730                   |
| 2                                                                         | 0.216                     | 1.298                   |
| 3                                                                         | 0.108                     | 0.865                   |
| 4                                                                         | 0.216                     | 0.692                   |
| 5                                                                         | 0.216                     | 0.865                   |
| 6                                                                         | 0.216                     | 0.346                   |
| 7                                                                         | 0.432                     | 0.692                   |
| 8                                                                         | 0.325                     | 0.519                   |
| 9                                                                         | 0.541                     | 0.519                   |

| <b>Measured concentration of K<sup>+</sup><br/>(background electrolyte)</b> |                             |                           |
|-----------------------------------------------------------------------------|-----------------------------|---------------------------|
| <i>i</i> <sup>th</sup> branch                                               | $c_{BGE\_i}^{initial}$ (mM) | $c_{BGE\_i}^{final}$ (mM) |
| 1                                                                           | 38.008                      | 32.066                    |
| 2                                                                           | 38.008                      | 27.943                    |
| 3                                                                           | 37.931                      | 27.441                    |
| 4                                                                           | 40.583                      | 31.190                    |
| 5                                                                           | 40.737                      | 30.037                    |
| 6                                                                           | 41.755                      | 32.112                    |
| 7                                                                           | 42.389                      | 31.252                    |
| 8                                                                           | 40.718                      | 28.763                    |
| 9                                                                           | 42.063                      | 29.531                    |

step 2) Substituting measured concentration value to eq. (7)

$$c_{\Delta x_i} = \frac{\Delta x_i}{\Delta V_i} = \left( \frac{c_{x_i}^{final} c_{BGE\_i}^{initial} - c_{x_i}^{initial} c_{BGE\_i}^{final}}{c_{BGE\_i}^{initial} - c_{BGE\_i}^{final}} \right), \dots \text{ eq. (7)}$$

$i = 1, 2, \dots, n.$

step 3) Finding reassigned concentration of analyte ion (Li<sup>+</sup>) caused by ICP from eq. (7)

| <b>Reassigned concentration of Li<sup>+</sup></b> |                        |
|---------------------------------------------------|------------------------|
| <i>i</i> <sup>th</sup> branch                     | $c_{\Delta Li_i}$ (mM) |
| 1                                                 | 9.902                  |
| 2                                                 | 4.300                  |
| 3                                                 | 2.845                  |
| 4                                                 | 2.272                  |
| 5                                                 | 2.685                  |
| 6                                                 | 0.778                  |
| 7                                                 | 1.420                  |
| 8                                                 | 0.987                  |
| 9                                                 | 0.467                  |
| inlet                                             | 19.908                 |

## Supporting Information 2:

### Concentration and number of species calculation in 2-branched device (Figure 4(a) and 4(b))

#### ◆ Quantitative data for Figure 4(a) and 4(b)

step 1) Measuring initial and final concentration of each outlet reservoir by using Ion chromatography

| Measured concentration of Li <sup>+</sup> , Na <sup>+</sup> , Cl <sup>-</sup><br>(analyte electrolyte) |                      |                      |                      |
|--------------------------------------------------------------------------------------------------------|----------------------|----------------------|----------------------|
| $x$                                                                                                    | Li <sup>+</sup> (mM) | Na <sup>+</sup> (mM) | Cl <sup>-</sup> (mM) |
| $c_x^{inlet}$                                                                                          | 55.828               | 63.0757              | 114.786              |
| $c_{x_i}^{initial}$                                                                                    | 0                    | 1.229                | 109.402              |
| $c_{x_1}^{final}$ (outside_IDZ)                                                                        | 7.528                | 8.891                | 102.164              |
| $c_{x_2}^{final}$ (inside_IDZ)                                                                         | 1.664                | 2.740                | 86.733               |
| $c_{x_3}^{final}$ (IEZ)                                                                                | 14.868               | 18.933               | 125.791              |

| Measured concentration of K <sup>+</sup><br>(background electrolyte) |                     |
|----------------------------------------------------------------------|---------------------|
| $x$                                                                  | K <sup>+</sup> (mM) |
| $c_x^{inlet}$                                                        | 0                   |
| $c_{BGE\_i}^{initial}$                                               | 106.345             |
| $c_{BGE\_1}^{final}$ (outside_IDZ)                                   | 78.144              |
| $c_{BGE\_2}^{final}$ (inside_IDZ)                                    | 72.383              |
| $c_{BGE\_3}^{final}$ (IEZ)                                           | 71.667              |

step 2) Substituting measured concentration value to eq. (7) and (8)

$$c_{\Delta x_i} = \frac{\Delta x_i}{\Delta V_i} = \left( \frac{c_{x_i}^{final} c_{BGE\_i}^{initial} - c_{x_i}^{initial} c_{BGE\_i}^{final}}{c_{BGE\_i}^{initial} - c_{BGE\_i}^{final}} \right), \quad \dots \quad \text{eq. (7)}$$

$$i = 1, 2, \dots, n.$$

$$c_{\Delta x_{ca}} = \frac{\Delta x_{ca}}{\Delta V_{ca}} = \left( \frac{c_{x_{ca}}^{final} c_{BGE\_ca}^{initial} - c_{x_{ca}}^{initial} c_{BGE\_ca}^{final}}{c_{BGE\_ca}^{initial} - c_{BGE\_ca}^{final}} \right), \quad \dots \quad \text{eq. (8)}$$

$$ca = \text{cathode.}$$

step 3) Finding reassigned concentration of analyte ion (Li<sup>+</sup>) caused by ICP from eq. (7) and (8).

| Reassigned concentration       |                      |                      |                      |
|--------------------------------|----------------------|----------------------|----------------------|
| $x$                            | Li <sup>+</sup> (mM) | Na <sup>+</sup> (mM) | Cl <sup>-</sup> (mM) |
| $c_{\Delta x_1}$ (outside_IDZ) | 34.542               | 36.385               | 76.192               |
| $c_{\Delta x_2}$ (inside_IDZ)  | 7.634                | 8.164                | 5.388                |
| $c_{\Delta x_3}$ (IEZ)         | 68.219               | 82.461               | 0                    |

| Normalized concentration             |                 |                 |                 |
|--------------------------------------|-----------------|-----------------|-----------------|
| $x$                                  | Li <sup>+</sup> | Na <sup>+</sup> | Cl <sup>-</sup> |
| $\frac{c_{\Delta x_1}}{c_x^{inlet}}$ | 0.619           | 0.577           | 0.664           |
| $\frac{c_{\Delta x_2}}{c_x^{inlet}}$ | 0.137           | 0.129           | 0.047           |
| $\frac{c_{\Delta x_3}}{c_x^{inlet}}$ | 1.222           | 1.307           | 0               |

step 4) Finding formula for normalized number of analyte ions

We can calculate normalized volume change in outlet reservoirs from eq.(3).

$$\frac{V_i}{\Delta V_i} = \frac{C_{BGE\_i}^{final}}{C_{BGE\_i}^{initial} - C_{BGE\_i}^{final}} \quad \dots \quad \text{eq. (3)}$$

Normalized volume change in  $i^{\text{th}}$  reservoir can be expressed as

the division of  $i^{\text{th}}$  volume change (  $\Delta V_i$  ) and total volume change (  $\sum_k \Delta V_k$  ).

Then, normalized number of analyte ion ( $N_{\Delta x_i}$ ) can be expressed as

the product of normalized concentration (  $\frac{C_{\Delta x_i}}{C_{x_i}^{inlet}}$  ) and normalized volume change (  $\frac{\Delta V_i}{\sum_k \frac{\Delta V_k}{V_k}}$  ).

$$N_{\Delta x_i} = \frac{C_{\Delta x_i}}{C_{x_i}^{inlet}} \times \frac{\Delta V_i}{\sum_k \frac{\Delta V_k}{V_k}} \quad \dots \quad \text{eq. (SI.1)}$$

step 5) Calculating values of normalized number of analyte ions in  $i^{\text{th}}$  branch

|                        | Normalized volume change                                         | Normalized number of Li <sup>+</sup> | Normalized number of Na <sup>+</sup> | Normalized number of Cl <sup>-</sup> |
|------------------------|------------------------------------------------------------------|--------------------------------------|--------------------------------------|--------------------------------------|
| $i^{\text{th}}$ branch | $\frac{\Delta V_i}{V_i} \frac{1}{\sum_k \frac{\Delta V_k}{V_k}}$ | $N_{\Delta Li_i}$                    | $N_{\Delta Na_i}$                    | $N_{\Delta Cl_i}$                    |
| 1 (outside_IDZ)        | 0.435                                                            | 0.291                                | 0.271                                | 0.312                                |
| 2 (inside_IDZ)         | 0.565                                                            | 0.064                                | 0.061                                | 0.022                                |
| 3 (IEZ)                | 0                                                                | 0.644                                | 0.668                                | 0                                    |

### Supporting Information 3:

### Concentration in 2-branched device (Figure 5(c))

#### ◆ Quantitative data for Figure 5(c)

step 1) Measuring initial and final concentration of each outlet reservoir by using ICP-MS or ICP-OES

| Measured concentration of Na <sup>+</sup> (analyte electrolyte) |                      |
|-----------------------------------------------------------------|----------------------|
| $x$                                                             | Na <sup>+</sup> (mM) |
| $c_x^{inlet}$                                                   | 326.276              |
| $c_{x_i}^{initial}$                                             | 0.288                |
| $c_{x_1}^{final}$ (outside_IDZ)                                 | 29.828               |
| $c_{x_2}^{final}$ (inside_IDZ)                                  | 9.333                |
| $c_{x_3}^{final}$ (IEZ)                                         | 153.426              |

| Measured concentration of K <sup>+</sup> (background electrolyte) |                     |
|-------------------------------------------------------------------|---------------------|
| $x$                                                               | K <sup>+</sup> (mM) |
| $c_x^{inlet}$                                                     | 0                   |
| $c_{BGE\_i}^{initial}$                                            | 94.289              |
| $c_{BGE\_1}^{final}$ (outside_IDZ)                                | 84.098              |
| $c_{BGE\_2}^{final}$ (inside_IDZ)                                 | 74.275              |
| $c_{BGE\_3}^{final}$ (IEZ)                                        | 74.659              |

step 2) Substituting measured concentration value to eq. (7) and (8)

$$c_{\Delta x_i} = \frac{\Delta x_i}{\Delta V_i} = \left( \frac{c_{x_i}^{final} c_{BGE\_i}^{initial} - c_{x_i}^{initial} c_{BGE\_i}^{final}}{c_{BGE\_i}^{initial} - c_{BGE\_i}^{final}} \right), \quad \dots \quad \text{eq. (7)}$$

$$i = 1, 2, \dots, n.$$

$$c_{\Delta x_{ca}} = \frac{\Delta x_{ca}}{\Delta V_{ca}} = \left( \frac{c_{x_{ca}}^{final} c_{BGE\_ca}^{initial} - c_{x_{ca}}^{initial} c_{BGE\_ca}^{final}}{c_{BGE\_ca}^{initial} - c_{BGE\_ca}^{final}} \right), \quad \dots \quad \text{eq. (8)}$$

$ca = \text{cathode.}$

step 3) Finding reassigned concentration of analyte ion (Li<sup>+</sup>) caused by ICP from eq. (7)

| Reassigned concentration       |                      |
|--------------------------------|----------------------|
| $x$                            | Na <sup>+</sup> (mM) |
| $c_{\Delta x_1}$ (outside_IDZ) | 187.206              |
| $c_{\Delta x_2}$ (inside_IDZ)  | 35.535               |
| $c_{\Delta x_3}$ (IEZ)         | 337.538              |

| Normalized concentration                           |                 |
|----------------------------------------------------|-----------------|
| $x$                                                | Na <sup>+</sup> |
| $\frac{c_{\Delta x_1}}{c_x^{inlet}}$ (outside_IDZ) | 0.574           |
| $\frac{c_{\Delta x_2}}{c_x^{inlet}}$ (inside_IDZ)  | 0.110           |
| $\frac{c_{\Delta x_3}}{c_x^{inlet}}$ (IEZ)         | 1.035           |
